# Supplementary material for: Tautomeric and conformational equilibria of biologically important (hydroxyphenyl)alkylamines in the gas phase and in aqueous solution
Source: Royal Society of Chemistry journal article supplement (doi:10.1039/b314924b), 2004-01-01
Supplement: b314924b.doc [file b314924b.doc]

# Tautomeric and conformational equilibria of biologically important (hydroxy-phenyl)-alkylamines in the gas phase and in aqueous solution

Peter I. Nagy a*and Krisztina Takács-Novák b

a Department of Medicinal and Biological Chemistry, The University of Toledo, Toledo,

##### OH, 43606-3390 e-mail: [pnagy@utnet.utoledo.edu](mailto:pnagy@utnet.utoledo.edu)

b Institute of Pharmaceutical Chemistry, Semmelweis University, Högyes E. u. 9,

H-1092 Budapest, Hungary

## Supplementary Information

Table S1. Optimized geometric parameters for substructure moieties in the gas phase and in aqueous solution by the continuum solvent model

Gas-phase Aqueous solution Exp.

B3LYP/6-31G* SCIPCM/B3LYP/6-31G*

CH3NH2

C-N 1.464 1.470 1.465±0.002 EDa

1.471 MWb

N-H 1.019 1.020 1.010 MWb

Phenol

C-O 1.369 1.368 1.374 MWc

O-H 0.970 0.973 0.957

C-C 1.393-1.399 1.395-1.401 1.391-1.395

Aniline

C-N 1.400 1.398 1.402±0.002 MWd

N-H 1.013 1.015 1.001±0.01

C-C 1.393-1.405 1.394-1.408 1.394-1.397±0.003

a ED = electron diffraction, Ref. 25a. b MW = microwave spectroscopy, Ref. 25b. c Ref. 26. d Ref. 27.

Table S2. Optimized geometric parameters for 4-aminophenol in the gas phase and in aqueous solution by the continuum solvent model

Gas phase Aqueous solution

B3LYP/6-31G* B3LYP/6-311++G** SCIPCM/B3LYP/6-31G*

neutral

N-C 1.408 1.406 1.408

N-H 1.014 1.010 1.015

C-C 1.391-1.405 1.393-1.403 1.397-1.406

C-O 1.375 1.377 1.375

O-H 0.969 0.962 0.971

HNC 113.7 114.7 113.4

NCC 120.8 120.8 120.9

C3C4C5 118.1 118.1 117.9
 C2C1C6 119.2 119.3 119.1

OCCa 117.7, 123.1 117.7, 123.1 117.6, 123.3

HOC 108.6 109.5 109.5

NCCC 176.9 177.0 176.4

zwitterionb

N-C 1.485 1.487 1.480

N-Hc 1.026, 1.037 1.023, 1.031 1.023, 1.029

C1C2 1.463 1.459 1.446

C2C3 1.375 1.375 1.388

C3C4 1.405 1.402 1.398

C-O 1.246 1.245 1.276

HNCc 110.6, 115.3 110.3, 114.6 111.8, 112.1

NCC 118.8 118.9 119.8

C3C4C5 121.4 121.4 120.4

C2C1C6 114.4 114.6 114.4

OCC 122.8 122.7 122.8

NCCC 172.1 172.3 177.7

Distances in Å, angles in degrees. a The larger OCC angle is associated with the CCOH = 0o torsion angle. b Molecular symmetry of Cs. c The larger value refers to the hydrogen in the symmetry plane.

Table S3. Atomic charges and dipole moments in aqueous solution

neutral

C4 O H(O) N H(N) H(N) DMqm DMelpo

4-amino-phenola

HF/6-31G*(g) 0.405 -0.655 0.434 -0.910 0.361 0.352 2.26 2.30

B3LYP/6-31G*(s) 0.351 -0.655 0.479 -0.932 0.393 0.385 2.77 2.79

B3LYP/6-311++G**(s) 0.429 -0.714 0.498 -1.057 0.434 0.418 3.30 3.20

Tyramine, gauche b

B3LYP/6-31G*(g) 0.333 -0.574 0.409 -0.975 0.346 0.333 2.51 2.47

HF/6-31G*(g) 0.424 -0.655 0.436 -1.052 0.363 0.348 2.75 2.70

B3LYP/6-31G*(s) 0.373 -0.623 0.465 -1.023 0.387 0.326 3.65 3.61

B3LYP/6-311++G**(s) 0.446 -0.685 0.487 -1.127 0.440 0.318 4.26 4.16

zwitterion

C4 O N H(N) H(N) H(N) DMqm DMelpo

4-amino-phenola

HF/6-31G*(g) 0.704 -0.752 -0.545 0.357 0.358 0.360 15.82 15.85

B3LYP/6-31G*(s) 0.515 -0.782 -0.519 0.388 0.388 0.402 20.20 20.20

B3LYP/6-311++G**(s) 0.633 -0.872 -0.541 0.398 0.386 0.396 20.32 20.18

Tyramineb

gauche

B3LYP/6-31G*(g) 0.523 -0.659 -0.279 0.289 0.291 0.238 16.52 16.47

HF/6-31G*(g) 0.709 -0.785 -0.355 0.309 0.314 0.265 18.00 17.93

B3LYP/6-31G*(s) 0.543 -0.888 -0.347 0.339 0.338 0.287 25.06 24.95

B3LYP/6-311++G**(s) 0.667 -0.902 -0.309 0.340 0.338 0.239 24.21 23.98

trans

HF/6-31G*(g) 0.696 -0.784 -0.397 0.306 0.314 0.311 25.33 25.27

B3LYP/6-31G*(s) 0.533 -0.891 -0.317 0.320 0.318 0.329 32.37 32.28

B3LYP/6-311++G**(s) 0.631 -0.897 -0.045 0.251 0.247 0.277 31.44 31.17

Letters s and g in parentheses refer to the in-solution and gas-phase electrostatic potential, respectively, used in the charge fitting procedure. B3LYP/6-311++G** charges were derived at the corresponding B3LYP/6-31G* optimized geometry. a Charges for the 4-amino phenol were optimized at the SCIPCM/B3LYP/6-31G* level with in-solution optimized geometries. bGas-phase geometries for tyramine were obtained from B3LYP/6-31G* optimizations for the trihydrates. In-solution charges were derived at geometries optimized at the PCM/B3LYP/6-31G* level .
